# Supplementary material for: The HAND-Q: Psychometrics of a New Patient-reported Outcome Measure for Clinical and Research Applications
Source: PubMed Central journal article supplement — Plast Reconstr Surg Glob Open. 2022 Jan 31;10(1):e3998. doi: 10.1097/GOX.0000000000003998 (PMC8849439; doi:10.1097/gox.0000000000003998), 2022-01-31
Supplement: gox-10-e3998-s001.pdf [file gox-10-e3998-s001.pdf]

**SDC 1: APPENDIX 1: Name of Ethics Board to approve the study in each collaborating site**

| <b>COUNTRY, CITY</b>    | <b>ETHICS BOARD</b>                                             |
|-------------------------|-----------------------------------------------------------------|
| Australia, Adelaide     | Southern Adelaide Clinical Human Research Ethics Committee      |
| Canada, New Brunswick   | Horizon Health Network Research Ethics Board                    |
| United States, Brooklyn | SUNY Downstate Medical Center IRB Committee                     |
| United Kingdom, Oxford  | North West – Greater Manchester South Research Ethics Committee |
| France, Nimes           | Nimes University Hospital Centre Ethics Committee               |
| Finland, Helsinki       | Ethics committee of Helsinki and Uusimaa Hospital District      |
