# Supplementary material for: The HAND-Q: Psychometrics of a New Patient-reported Outcome Measure for Clinical and Research Applications
Source: PubMed Central journal article supplement — Plast Reconstr Surg Glob Open. 2022 Jan 31;10(1):e3998. doi: 10.1097/GOX.0000000000003998 (PMC8849439; doi:10.1097/gox.0000000000003998), 2022-01-31
Supplement: gox-10-e3998-s002.pdf [file gox-10-e3998-s002.pdf]

**SDC 2: APPENDIX 2: RMT item level fit statistics and Differential Item Function (DIF) results**

| Scale                  | Items          | Item Fit Statistics |      |         |        |          |    |         | DIF    |     |          |      |
|------------------------|----------------|---------------------|------|---------|--------|----------|----|---------|--------|-----|----------|------|
|                        |                | Location            | SE   | Fit Res | DF     | $\chi^2$ | DF | P-value | Gender | Age | Language | Type |
| Appearance             | Gender         | -0.42               | 0.06 | 1.76    | 792.19 | 8.49     | 9  | 0.49    | Yes    | No  | No       | No   |
|                        | Size fingers   | -0.27               | 0.05 | -1.08   | 807.39 | 7.66     | 9  | 0.57    | No     | No  | No       | No   |
|                        | Wave           | -0.22               | 0.05 | -3.62   | 802.02 | 12.07    | 9  | 0.21    | No     | No  | Yes      | No   |
|                        | Proportion     | -0.14               | 0.05 | -2.44   | 798.45 | 13.07    | 9  | 0.16    | No     | No  | Yes      | No   |
|                        | Shape fingers  | -0.02               | 0.05 | -3.50   | 814.54 | 11.26    | 9  | 0.26    | No     | No  | No       | No   |
|                        | Line up        | 0.00                | 0.05 | -1.59   | 810.96 | 9.06     | 9  | 0.43    | No     | No  | No       | No   |
|                        | Knuckles       | 0.02                | 0.05 | 4.28    | 804.70 | 16.44    | 9  | 0.06    | No     | No  | No       | No   |
|                        | Normal         | 0.20                | 0.05 | -1.71   | 805.60 | 12.42    | 9  | 0.19    | No     | No  | No       | No   |
|                        | Hold glass     | 0.30                | 0.05 | 0.93    | 794.87 | 2.66     | 9  | 0.98    | No     | No  | Yes      | No   |
|                        | Straight       | 0.56                | 0.05 | 3.89    | 808.28 | 12.41    | 9  | 0.19    | No     | No  | No       | No   |
| Appearance age-related | Veins          | -0.62               | 0.05 | -0.34   | 821.97 | 10.38    | 9  | 0.32    | Yes    | Yes | No       | Yes  |
|                        | Tendons        | -0.42               | 0.05 | 0.88    | 816.61 | 7.25     | 9  | 0.61    | No     | No  | No       | No   |
|                        | Wave           | -0.34               | 0.05 | -2.37   | 830.02 | 12.36    | 9  | 0.19    | No     | Yes | Yes      | Yes  |
|                        | Skin           | -0.19               | 0.05 | 2.66    | 822.87 | 3.56     | 9  | 0.94    | No     | No  | No       | No   |
|                        | Rest palms     | 0.12                | 0.05 | -0.59   | 825.55 | 5.56     | 9  | 0.78    | No     | Yes | No       | Yes  |
|                        | Hold glass     | 0.13                | 0.05 | 1.26    | 824.65 | 3.39     | 9  | 0.95    | No     | No  | No       | No   |
|                        | Age            | 0.18                | 0.05 | 0.54    | 820.19 | 3.86     | 9  | 0.92    | Yes    | Yes | No       | Yes  |
|                        | Compared       | 0.26                | 0.05 | -2.78   | 821.97 | 10.94    | 9  | 0.28    | No     | Yes | No       | Yes  |
|                        | Youthful       | 0.31                | 0.05 | 1.58    | 819.29 | 7.80     | 9  | 0.55    | No     | Yes | No       | Yes  |
|                        | Close up       | 0.57                | 0.05 | -3.95   | 822.87 | 23.41    | 9  | 0.01    | No     | No  | No       | No   |
| Function               | Eat with hands | -0.77               | 0.05 | -3.39   | 929.75 | 12.10    | 9  | 0.21    | Yes    | No  | No       | Yes  |
|                        | Brush teeth    | -0.74               | 0.05 | -1.29   | 924.18 | 5.06     | 9  | 0.83    | No     | No  | No       | No   |

|               |                      |       |      |       |        |       |   |      |     |     |     |     |
|---------------|----------------------|-------|------|-------|--------|-------|---|------|-----|-----|-----|-----|
|               | Wash hands           | -0.65 | 0.05 | 3.15  | 936.25 | 7.01  | 9 | 0.64 | Yes | Yes | Yes | Yes |
|               | Grooming             | -0.56 | 0.05 | -1.63 | 936.25 | 8.12  | 9 | 0.52 | No  | No  | No  | Yes |
|               | Get dressed          | -0.54 | 0.05 | -3.70 | 938.11 | 13.10 | 9 | 0.16 | No  | No  | No  | No  |
|               | Hold glass           | -0.27 | 0.05 | -5.31 | 939.97 | 17.55 | 9 | 0.04 | No  | No  | No  | No  |
|               | Hold phone           | -0.22 | 0.05 | 4.23  | 938.11 | 3.99  | 9 | 0.91 | Yes | No  | Yes | Yes |
|               | Clean after toilet   | -0.18 | 0.05 | 3.53  | 924.18 | 7.11  | 9 | 0.63 | No  | Yes | No  | No  |
|               | Use cutlery          | -0.10 | 0.05 | -5.46 | 939.97 | 19.12 | 9 | 0.02 | No  | No  | No  | Yes |
|               | Turn tap             | -0.02 | 0.05 | -1.71 | 941.83 | 6.90  | 9 | 0.65 | No  | No  | Yes | No  |
|               | Write                | 0.29  | 0.05 | 2.84  | 924.18 | 4.70  | 9 | 0.86 | No  | Yes | No  | No  |
|               | Turn key             | 0.41  | 0.05 | -2.71 | 947.40 | 7.02  | 9 | 0.64 | No  | No  | No  | No  |
|               | Grip handle          | 0.79  | 0.05 | 2.48  | 931.61 | 7.54  | 9 | 0.58 | No  | No  | No  | No  |
|               | Prepare food         | 0.93  | 0.05 | -2.78 | 938.11 | 13.87 | 9 | 0.13 | No  | No  | No  | No  |
|               | Open jar             | 1.62  | 0.05 | 6.43  | 938.11 | 28.16 | 9 | 0.00 | Yes | No  | No  | Yes |
| Life impact   | Close relationships  | -1.01 | 0.05 | -1.91 | 883.49 | 7.12  | 9 | 0.62 | No  | No  | No  | No  |
|               | Social life          | -0.74 | 0.05 | -4.19 | 876.53 | 15.39 | 9 | 0.08 | No  | No  | Yes | No  |
|               | Relax                | -0.45 | 0.05 | -2.47 | 885.23 | 13.69 | 9 | 0.13 | No  | No  | No  | No  |
|               | Emotional wellbeing  | -0.42 | 0.05 | -2.91 | 882.62 | 17.94 | 9 | 0.04 | No  | No  | Yes | No  |
|               | Independence         | 0.11  | 0.04 | -1.71 | 885.23 | 7.87  | 9 | 0.55 | No  | No  | Yes | Yes |
|               | Sleep                | 0.37  | 0.04 | 5.80  | 888.72 | 10.99 | 9 | 0.28 | Yes | Yes | Yes | Yes |
|               | Physical activity    | 0.97  | 0.04 | 3.00  | 893.07 | 6.23  | 9 | 0.72 | Yes | No  | No  | Yes |
|               | Activities you enjoy | 1.17  | 0.04 | 0.76  | 886.10 | 4.93  | 9 | 0.84 | Yes | No  | No  | No  |
| Psychological | Hopeless             | -0.75 | 0.05 | -2.50 | 903.95 | 7.73  | 9 | 0.56 | No  | No  | No  | No  |
|               | Overwhelmed          | -0.62 | 0.05 | -3.99 | 907.53 | 13.30 | 9 | 0.15 | No  | No  | Yes | No  |
|               | Depressed            | -0.52 | 0.05 | -4.07 | 918.28 | 15.09 | 9 | 0.09 | No  | No  | No  | No  |
|               | Sorry for yourself   | -0.38 | 0.05 | 2.09  | 912.01 | 7.93  | 9 | 0.54 | No  | No  | Yes | No  |
|               | Anxious              | -0.37 | 0.05 | -2.36 | 910.22 | 10.80 | 9 | 0.29 | No  | No  | No  | No  |

|          |                     |       |      |       |        |       |   |      |     |     |     |     |
|----------|---------------------|-------|------|-------|--------|-------|---|------|-----|-----|-----|-----|
|          | Useless             | -0.09 | 0.05 | 0.15  | 907.53 | 6.23  | 9 | 0.72 | No  | No  | No  | No  |
|          | Upset               | 0.26  | 0.05 | -2.33 | 917.39 | 8.56  | 9 | 0.48 | No  | No  | Yes | No  |
|          | Fed-up              | 0.53  | 0.05 | 0.28  | 910.22 | 10.31 | 9 | 0.33 | No  | No  | No  | No  |
|          | Worried             | 0.53  | 0.05 | 1.37  | 916.49 | 2.32  | 9 | 0.99 | Yes | Yes | No  | Yes |
|          | Frustrated          | 1.41  | 0.05 | 0.09  | 917.39 | 10.51 | 9 | 0.31 | No  | No  | Yes | No  |
| Sexual   | Enjoyment affected  | -0.54 | 0.09 | -2.23 | 260.41 | 12.50 | 4 | 0.01 | No  | No  | No  | -   |
|          | Symptoms interfere  | -0.30 | 0.09 | 1.93  | 259.56 | 3.80  | 4 | 0.43 | No  | Yes | Yes | -   |
|          | Hands distraction   | -0.29 | 0.09 | -2.11 | 259.56 | 9.70  | 4 | 0.05 | No  | No  | No  | -   |
|          | Aware of hands      | -0.07 | 0.09 | -0.52 | 257.02 | 3.69  | 4 | 0.45 | No  | No  | No  | -   |
|          | Giving pleasure     | -0.02 | 0.09 | -0.51 | 258.72 | 4.58  | 4 | 0.33 | No  | No  | No  | -   |
|          | Tender ways         | 0.48  | 0.09 | 3.55  | 262.94 | 7.29  | 4 | 0.12 | No  | No  | No  | -   |
|          | Hand function       | 0.73  | 0.09 | -0.67 | 263.79 | 1.13  | 4 | 0.89 | No  | No  | Yes | -   |
| Symptoms | Cramping            | -0.56 | 0.04 | 0.32  | 978.95 | 3.23  | 8 | 0.92 | No  | No  | Yes | No  |
|          | Pain at rest        | -0.54 | 0.04 | -2.66 | 975.37 | 10.57 | 8 | 0.23 | No  | Yes | No  | No  |
|          | Tingling            | -0.17 | 0.04 | 0.69  | 982.53 | 3.26  | 8 | 0.92 | No  | No  | No  | Yes |
|          | Numb                | -0.10 | 0.04 | 2.03  | 982.53 | 2.85  | 8 | 0.94 | No  | No  | No  | Yes |
|          | Clumsiness          | -0.07 | 0.04 | -0.85 | 966.41 | 4.98  | 8 | 0.76 | Yes | Yes | No  | No  |
|          | Swelling            | -0.04 | 0.04 | 3.40  | 974.47 | 6.32  | 8 | 0.61 | No  | No  | No  | Yes |
|          | Sleep disturbance   | 0.01  | 0.04 | -2.71 | 977.16 | 9.95  | 8 | 0.27 | No  | Yes | Yes | Yes |
|          | Stiff               | 0.44  | 0.04 | 0.92  | 987.01 | 0.62  | 8 | 1.00 | No  | No  | No  | Yes |
|          | Pain at use         | 0.51  | 0.04 | -0.48 | 977.16 | 8.19  | 8 | 0.42 | No  | No  | No  | No  |
|          | Weak                | 0.52  | 0.04 | -1.62 | 983.43 | 5.83  | 8 | 0.67 | No  | No  | No  | No  |
| Clinic   | Privacy             | -0.98 | 0.13 | 0.99  | 221.77 | 1.97  | 3 | 0.58 | -   | -   | -   | -   |
|          | Sterile             | -0.94 | 0.13 | -1.97 | 228.00 | 6.83  | 3 | 0.08 | -   | -   | -   | -   |
|          | Knowledgeable staff | -0.22 | 0.12 | 0.87  | 222.66 | 1.53  | 3 | 0.68 | -   | -   | -   | -   |
|          | Recommend           | -0.09 | 0.12 | -2.04 | 224.44 | 8.28  | 3 | 0.04 | -   | -   | -   | -   |

|                |                       |       |      |       |        |      |   |      |   |   |   |   |
|----------------|-----------------------|-------|------|-------|--------|------|---|------|---|---|---|---|
|                | Front desk            | 0.01  | 0.12 | 1.35  | 229.79 | 6.58 | 3 | 0.09 | - | - | - | - |
|                | Easy to book          | 0.06  | 0.11 | 0.42  | 227.11 | 1.18 | 3 | 0.76 | - | - | - | - |
|                | Atmosphere            | 0.09  | 0.12 | -0.66 | 228.90 | 6.03 | 3 | 0.11 | - | - | - | - |
|                | Organized             | 0.31  | 0.11 | -2.20 | 228.00 | 7.82 | 3 | 0.05 | - | - | - | - |
|                | Consistent staff      | 0.69  | 0.11 | 0.29  | 221.77 | 2.81 | 3 | 0.42 | - | - | - | - |
|                | Enough staff          | 1.07  | 0.10 | 1.58  | 223.55 | 7.55 | 3 | 0.06 | - | - | - | - |
| Doctor         | Friendly              | -0.60 | 0.15 | -1.23 | 158.74 | 3.95 | 2 | 0.14 | - | - | - | - |
|                | Knowledgeable         | -0.56 | 0.15 | -0.06 | 156.98 | 0.72 | 2 | 0.70 | - | - | - | - |
|                | What to do            | -0.40 | 0.15 | -1.35 | 155.21 | 3.76 | 2 | 0.15 | - | - | - | - |
|                | Right experience      | -0.24 | 0.14 | -0.69 | 155.21 | 1.21 | 2 | 0.55 | - | - | - | - |
|                | Easy to talk to       | -0.01 | 0.14 | 0.11  | 157.86 | 2.43 | 2 | 0.30 | - | - | - | - |
|                | Answered questions    | 0.05  | 0.13 | -1.97 | 157.86 | 3.41 | 2 | 0.18 | - | - | - | - |
|                | High level care       | 0.11  | 0.14 | -0.74 | 153.45 | 1.00 | 2 | 0.61 | - | - | - | - |
|                | Inspired hope         | 0.45  | 0.13 | 2.24  | 156.98 | 7.85 | 2 | 0.02 | - | - | - | - |
|                | Attentive             | 0.47  | 0.13 | -1.57 | 158.74 | 5.55 | 2 | 0.06 | - | - | - | - |
|                | Involved in decisions | 0.73  | 0.12 | 1.47  | 156.98 | 1.55 | 2 | 0.46 | - | - | - | - |
| Hand therapist | Respect               | -2.88 | 0.33 | -0.44 | 54.61  | 1.35 | 2 | 0.51 | - | - | - | - |
|                | Easy to understand    | -0.78 | 0.33 | -1.29 | 55.47  | 1.49 | 2 | 0.48 | - | - | - | - |
|                | High level care       | -0.26 | 0.28 | -1.18 | 53.76  | 2.81 | 2 | 0.25 | - | - | - | - |
|                | Knowledgeable         | 0.06  | 0.28 | -0.17 | 55.47  | 1.91 | 2 | 0.39 | - | - | - | - |
|                | Careful               | 0.21  | 0.27 | -0.43 | 53.76  | 2.04 | 2 | 0.36 | - | - | - | - |
|                | Caring                | 0.22  | 0.27 | -1.34 | 55.47  | 1.52 | 2 | 0.47 | - | - | - | - |
|                | Answered questions    | 0.39  | 0.25 | -0.94 | 55.47  | 1.77 | 2 | 0.41 | - | - | - | - |
|                | Understood concerns   | 0.61  | 0.26 | -1.51 | 54.61  | 0.98 | 2 | 0.61 | - | - | - | - |
|                | Spent time            | 0.80  | 0.25 | 0.18  | 53.76  | 0.78 | 2 | 0.68 | - | - | - | - |
|                | Inspired hope         | 1.64  | 0.23 | 2.05  | 54.61  | 8.74 | 2 | 0.01 | - | - | - | - |

|              |                    |       |      |        |        |       |      |      |    |    |    |    |
|--------------|--------------------|-------|------|--------|--------|-------|------|------|----|----|----|----|
| Information  | Who is involved    | -0.75 | 0.14 | -1.07  | 187.71 | 3.98  | 2    | 0.14 | -  | -  | -  | -  |
|              | Easy to understand | -0.43 | 0.13 | -3.52  | 189.48 | 7.52  | 2    | 0.02 | -  | -  | -  | -  |
|              | How surgery done   | -0.35 | 0.13 | 0.95   | 188.60 | 0.58  | 2    | 0.75 | -  | -  | -  | -  |
|              | Easy to ask        | -0.30 | 0.13 | -1.84  | 188.60 | 1.75  | 2    | 0.42 | -  | -  | -  | -  |
|              | Questions answered | -0.02 | 0.12 | -2.08  | 186.83 | 2.20  | 2    | 0.33 | -  | -  | -  | -  |
|              | Time to discuss    | 0.29  | 0.12 | -1.58  | 188.60 | 2.82  | 2    | 0.24 | -  | -  | -  | -  |
|              | Complications      | 0.29  | 0.12 | 3.73   | 185.06 | 4.69  | 2    | 0.10 | -  | -  | -  | -  |
|              | Achieve goals      | 0.41  | 0.12 | 0.97   | 188.60 | 0.89  | 2    | 0.64 | -  | -  | -  | -  |
|              | Expectations       | 0.43  | 0.12 | -0.69  | 185.94 | 2.79  | 2    | 0.25 | -  | -  | -  | -  |
| Consistent   | 0.44               | 0.11  | 0.37 | 188.60 | 1.69   | 2     | 0.43 | -    | -  | -  | -  |    |
| Office staff | Professional       | -0.50 | 0.22 | -1.09  | 60.96  | 3.38  | 2    | 0.18 | -  | -  | -  | -  |
|              | Comfortable        | -0.31 | 0.24 | 0.14   | 61.79  | 1.02  | 2    | 0.60 | -  | -  | -  | -  |
|              | Friendly           | -0.25 | 0.23 | -0.69  | 60.96  | 2.32  | 2    | 0.31 | -  | -  | -  | -  |
|              | Answered questions | 0.07  | 0.23 | -0.13  | 60.96  | 0.11  | 2    | 0.95 | -  | -  | -  | -  |
|              | Thorough           | 0.16  | 0.22 | -0.52  | 61.79  | 0.53  | 2    | 0.77 | -  | -  | -  | -  |
|              | Team work          | 0.16  | 0.23 | 0.15   | 60.96  | 0.43  | 2    | 0.81 | -  | -  | -  | -  |
|              | Attentive          | 0.26  | 0.23 | -0.55  | 61.79  | 1.18  | 2    | 0.55 | -  | -  | -  | -  |
|              | Knowledgeable      | 0.42  | 0.21 | -1.22  | 61.79  | 1.17  | 2    | 0.56 | -  | -  | -  | -  |
| Outcome      | Glad had it        | -1.61 | 0.12 | -0.15  | 271.41 | 1.88  | 4    | 0.76 | No | No | No | No |
|              | Recommend          | -0.33 | 0.10 | -0.92  | 262.13 | 6.08  | 4    | 0.19 | No | No | No | No |
|              | Have it again      | -0.10 | 0.10 | 1.14   | 262.13 | 4.45  | 4    | 0.35 | No | No | No | No |
|              | Satisfied          | 0.07  | 0.10 | -0.27  | 266.35 | 3.82  | 4    | 0.43 | No | No | No | No |
|              | Changed life       | 0.49  | 0.10 | 1.99   | 259.61 | 2.38  | 4    | 0.67 | No | No | No | No |
|              | Met expectations   | 0.62  | 0.10 | -2.04  | 262.98 | 3.19  | 4    | 0.53 | No | No | No | No |
|              | Turned out great   | 0.86  | 0.10 | -2.74  | 255.39 | 11.14 | 4    | 0.03 | No | No | No | No |
| Splint       | Remove             | -1.06 | 0.09 | 0.62   | 296.90 | 8.73  | 4    | 0.07 | -  | -  | -  | -  |

|  |             |       |          |           |            |           |   |      |   |   |   |   |
|--|-------------|-------|----------|-----------|------------|-----------|---|------|---|---|---|---|
|  | Looked      | -0.61 | 0.<br>08 | 1.10      | 307.<br>26 | 8.7<br>6  | 4 | 0.07 | - | - | - | - |
|  | Socialize   | -0.58 | 0.<br>08 | -<br>2.16 | 302.<br>94 | 10.<br>45 | 4 | 0.03 | - | - | - | - |
|  | Enjoy life  | 0.03  | 0.<br>08 | -<br>2.17 | 308.<br>12 | 11.<br>28 | 4 | 0.02 | - | - | - | - |
|  | Comfortable | 0.30  | 0.<br>08 | 0.49      | 313.<br>30 | 1.2<br>3  | 4 | 0.87 | - | - | - | - |
|  | Sleep       | 0.44  | 0.<br>08 | -<br>0.16 | 308.<br>98 | 3.8<br>0  | 4 | 0.43 | - | - | - | - |
|  | Active      | 0.55  | 0.<br>08 | 0.44      | 307.<br>26 | 1.7<br>5  | 4 | 0.78 | - | - | - | - |
|  | Get dressed | 0.92  | 0.<br>08 | 0.42      | 307.<br>26 | 6.4<br>1  | 4 | 0.17 | - | - | - | - |

SE = standard error; DF = degrees of freedom;  $\chi^2$  = Chi-square
