# Supplementary material for: The HAND-Q: Psychometrics of a New Patient-reported Outcome Measure for Clinical and Research Applications
Source: PubMed Central journal article supplement — Plast Reconstr Surg Glob Open. 2022 Jan 31;10(1):e3998. doi: 10.1097/GOX.0000000000003998 (PMC8849439; doi:10.1097/gox.0000000000003998), 2022-01-31
Supplement: gox-10-e3998-s003.pdf [file gox-10-e3998-s003.pdf]

**SDC 3: APPENDIX 3: Characteristics of subgroups**

**A: Hypothesis 2 – Visible vs invisible hand condition**

|                   |                        | Carpal Tunnel = 183 |     | Appearance-related = 111 |     |
|-------------------|------------------------|---------------------|-----|--------------------------|-----|
|                   |                        | N                   | %   | N                        | %   |
| COUNTRY           | Australia              | 50                  | 27  | 52                       | 47  |
|                   | Canada                 | 58                  | 32  | 0                        | 0   |
|                   | Finland                | 23                  | 13  | 33                       | 30  |
|                   | France                 | 15                  | 8   | 13                       | 12  |
|                   | UK                     | 0                   | 0   | 0                        | 0   |
|                   | USA                    | 37                  | 20  | 13                       | 12  |
| LANGUAGE          | English                | 145                 | 79  | 65                       | 59  |
|                   | Other                  | 38                  | 21  | 46                       | 41  |
| GENDER            | Male                   | 59                  | 32  | 39                       | 35  |
|                   | Female                 | 118                 | 65  | 71                       | 64  |
|                   | Other                  | 4                   | 2   | 0                        | 0   |
|                   | Missing                | 3                   | 1   | 1                        | 1   |
| AGE               | 16-39                  | 20                  | 11  | 6                        | 5   |
|                   | 40-59                  | 83                  | 45  | 35                       | 32  |
|                   | 60+                    | 77                  | 42  | 68                       | 61  |
|                   | Missing                | 3                   | 2   | 2                        | 2   |
| EDUCATION         | Primary school         | 11                  | 6   | 8                        | 7   |
|                   | High school            | 81                  | 44  | 54                       | 49  |
|                   | Further education      | 81                  | 44  | 42                       | 38  |
|                   | Other                  | 7                   | 4   | 5                        | 5   |
|                   | Missing                | 3                   | 2   | 2                        | 2   |
| HAND CONDITION    | Carpal tunnel syndrome | 183                 | 100 | 0                        | 0   |
|                   | Dupuytren's disease    | 0                   | 0   | 36                       | 32  |
|                   | Osteoarthritis         | 0                   | 0   | 62                       | 56  |
|                   | Rheumatoid arthritis   | 0                   | 0   | 13                       | 12  |
| TYPE OF CONDITION | Non-traumatic          | 183                 | 100 | 111                      | 100 |
|                   | Traumatic              | 0                   | 0   | 0                        | 0   |

**B: Hypothesis 3– Self-reported hand condition severity**

|                   |                                              | Mild = 202 |    | Moderate = 521 |    | Severe = 521 |    |
|-------------------|----------------------------------------------|------------|----|----------------|----|--------------|----|
|                   |                                              | N          | %  | N              | %  | N            | %  |
| COUNTRY           | Australia                                    | 47         | 23 | 189            | 36 | 197          | 38 |
|                   | Canada                                       | 8          | 4  | 32             | 6  | 39           | 8  |
|                   | Finland                                      | 38         | 19 | 104            | 20 | 40           | 8  |
|                   | France                                       | 10         | 5  | 34             | 7  | 36           | 7  |
|                   | UK                                           | 20         | 10 | 51             | 10 | 26           | 5  |
|                   | USA                                          | 79         | 39 | 111            | 21 | 183          | 35 |
| LANGUAGE          | English                                      | 154        | 76 | 383            | 74 | 445          | 85 |
|                   | Other                                        | 48         | 24 | 138            | 27 | 76           | 15 |
| GENDER            | Male                                         | 91         | 45 | 249            | 48 | 217          | 42 |
|                   | Female                                       | 109        | 54 | 263            | 51 | 294          | 56 |
|                   | Other                                        | 0          | 0  | 3              | 1  | 3            | 1  |
|                   | Missing                                      | 2          | 1  | 6              | 1  | 7            | 1  |
| AGE               | 16-39                                        | 63         | 31 | 173            | 33 | 114          | 22 |
|                   | 40-59                                        | 92         | 46 | 189            | 36 | 214          | 41 |
|                   | 60+                                          | 46         | 23 | 153            | 29 | 184          | 35 |
|                   | Missing                                      | 1          | 1  | 6              | 1  | 9            | 2  |
| EDUCATION         | Primary school                               | 10         | 5  | 23             | 4  | 29           | 6  |
|                   | High School                                  | 76         | 38 | 226            | 43 | 250          | 48 |
|                   | Further education                            | 105        | 52 | 235            | 45 | 217          | 42 |
|                   | Other                                        | 10         | 5  | 26             | 5  | 18           | 4  |
|                   | Missing                                      | 1          | 1  | 11             | 2  | 7            | 1  |
| HAND CONDITION    | Carpal tunnel syndrome                       | 20         | 10 | 66             | 13 | 94           | 18 |
|                   | Dupuytren's disease                          | 6          | 3  | 15             | 3  | 15           | 3  |
|                   | Trigger finger                               | 10         | 5  | 25             | 5  | 34           | 7  |
|                   | Osteoarthritis                               | 2          | 2  | 31             | 6  | 29           | 6  |
|                   | Rheumatoid arthritis                         | 1          | 1  | 4              | 1  | 8            | 2  |
|                   | Other nerve compression                      | 4          | 2  | 8              | 2  | 11           | 2  |
|                   | Ganglion                                     | 4          | 2  | 12             | 2  | 2            | 0  |
|                   | Trauma (injury, fracture)                    | 89         | 44 | 233            | 45 | 192          | 37 |
|                   | Multiple non-traumatic conditions            | 9          | 5  | 54             | 10 | 54           | 10 |
|                   | Mixed non-traumatic and traumatic conditions | 13         | 6  | 24             | 5  | 28           | 5  |
|                   | Other                                        | 44         | 22 | 49             | 9  | 54           | 10 |
| TYPE OF CONDITION | Non-traumatic                                | 99         | 49 | 264            | 51 | 296          | 57 |
|                   | Traumatic                                    | 90         | 45 | 233            | 45 | 196          | 38 |
|                   | Missing                                      | 13         | 6  | 24             | 5  | 28           | 5  |

**C: Hypothesis 4 – Self reported need for more surgery**

|                   |                                              | Yes – need = 95 |    | No – do not need = 249 |    |
|-------------------|----------------------------------------------|-----------------|----|------------------------|----|
|                   |                                              | N               | %  | N                      | %  |
| COUNTRY           | Australia                                    | 48              | 51 | 82                     | 33 |
|                   | Canada                                       | 6               | 6  | 39                     | 16 |
|                   | Finland                                      | 16              | 17 | 43                     | 17 |
|                   | France                                       | 6               | 6  | 16                     | 6  |
|                   | UK                                           | 3               | 3  | 12                     | 5  |
|                   | USA                                          | 16              | 17 | 57                     | 23 |
| LANGUAGE          | English                                      | 73              | 77 | 190                    | 76 |
|                   | Other                                        | 22              | 23 | 59                     | 24 |
| GENDER            | Male                                         | 47              | 50 | 120                    | 48 |
|                   | Female                                       | 47              | 50 | 124                    | 50 |
|                   | Other                                        | 0               | 0  | 2                      | 1  |
|                   | Missing                                      | 1               | 1  | 3                      | 1  |
| AGE               | 16-39                                        | 24              | 25 | 67                     | 27 |
|                   | 40-59                                        | 40              | 42 | 80                     | 32 |
|                   | 60+                                          | 29              | 31 | 95                     | 38 |
|                   | Missing                                      | 2               | 2  | 7                      | 3  |
| EDUCATION         | Primary school                               | 8               | 8  | 6                      | 2  |
|                   | High school                                  | 50              | 53 | 108                    | 43 |
|                   | Further education                            | 34              | 36 | 119                    | 48 |
|                   | Other                                        | 1               | 1  | 10                     | 4  |
|                   | Missing                                      | 2               | 2  | 6                      | 2  |
| HAND CONDITION    | Carpal tunnel syndrome                       | 13              | 14 | 57                     | 23 |
|                   | Dupuytren's disease                          | 9               | 10 | 8                      | 3  |
|                   | Trigger finger                               | 9               | 10 | 14                     | 6  |
|                   | Osteoarthritis                               | 8               | 8  | 14                     | 6  |
|                   | Rheumatoid arthritis                         | 2               | 2  | 0                      | 0  |
|                   | Other nerve compression                      | 1               | 1  | 7                      | 3  |
|                   | Ganglion                                     | 2               | 2  | 2                      | 1  |
|                   | Trauma (injury, fracture)                    | 21              | 22 | 113                    | 45 |
|                   | Multiple non-traumatic conditions            | 10              | 11 | 8                      | 3  |
|                   | Mixed non-traumatic and traumatic conditions | 9               | 10 | 5                      | 2  |
|                   | Other                                        | 11              | 12 | 21                     | 8  |
| TYPE OF CONDITION | Non-traumatic                                | 64              | 67 | 129                    | 52 |
|                   | Traumatic                                    | 22              | 23 | 115                    | 46 |
|                   | Missing                                      | 9               | 10 | 5                      | 2  |
